# MIND TO MIND

*Creative writing that explores the abstract side  
of our profession and our lives*

*Stephen T. Harvey, M.D., Editor*

## Formal Diagnosis

Elizabeth Brooke Baker, M.D.

This morning I'll put sugar in my tea.  
I don't do it often (you know what They  
Say about sugar), it's usually  
Just a little milk and a longish steep.

Today though, I feel differently.  
Today is a day I might need a bit  
Of sweetness to temper the news I'll get  
Which tastes of bitterness, sourness, salt

I put one cube, no, two inside my cup  
And stir, clockwise, watching the snow-white  
Squares turn to mud-slush, and I sip slowly  
As the tannins fade away, and I smile.

Today will be a day of two sugars,  
Of listening and breathing and planning.  
It will be a day of new things, hard things,  
Important things. I'll go to it, sweetly.

Carol Wiley Cassella, M.D., served as Handling Editor for this submission.

From the University of New Mexico Albuquerque, Albuquerque, New Mexico. ebbaker@salud.unm.edu

Accepted for publication August 19, 2016.

Permission to reprint granted to the American Society of Anesthesiologists, Inc., and Wolters Kluwer Health, Inc., by copyright author/owner.  
Anesthesiology 2017; 126:755
